# Supplementary material
Source: PubMed Central journal article supplement (PMC1885631)

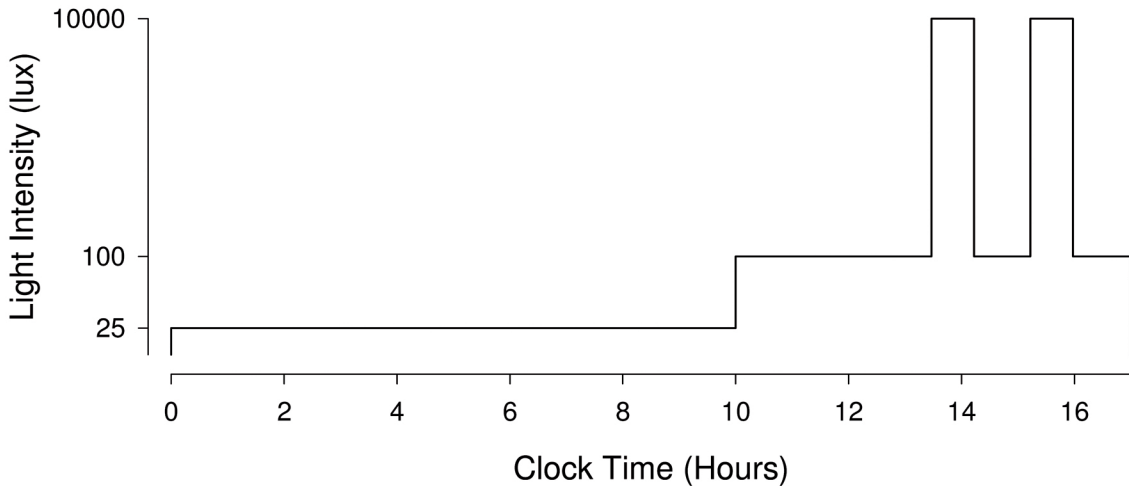

Supplement: pnas_0702835104_1.pdf [file pnas_0702835104_1.pdf]

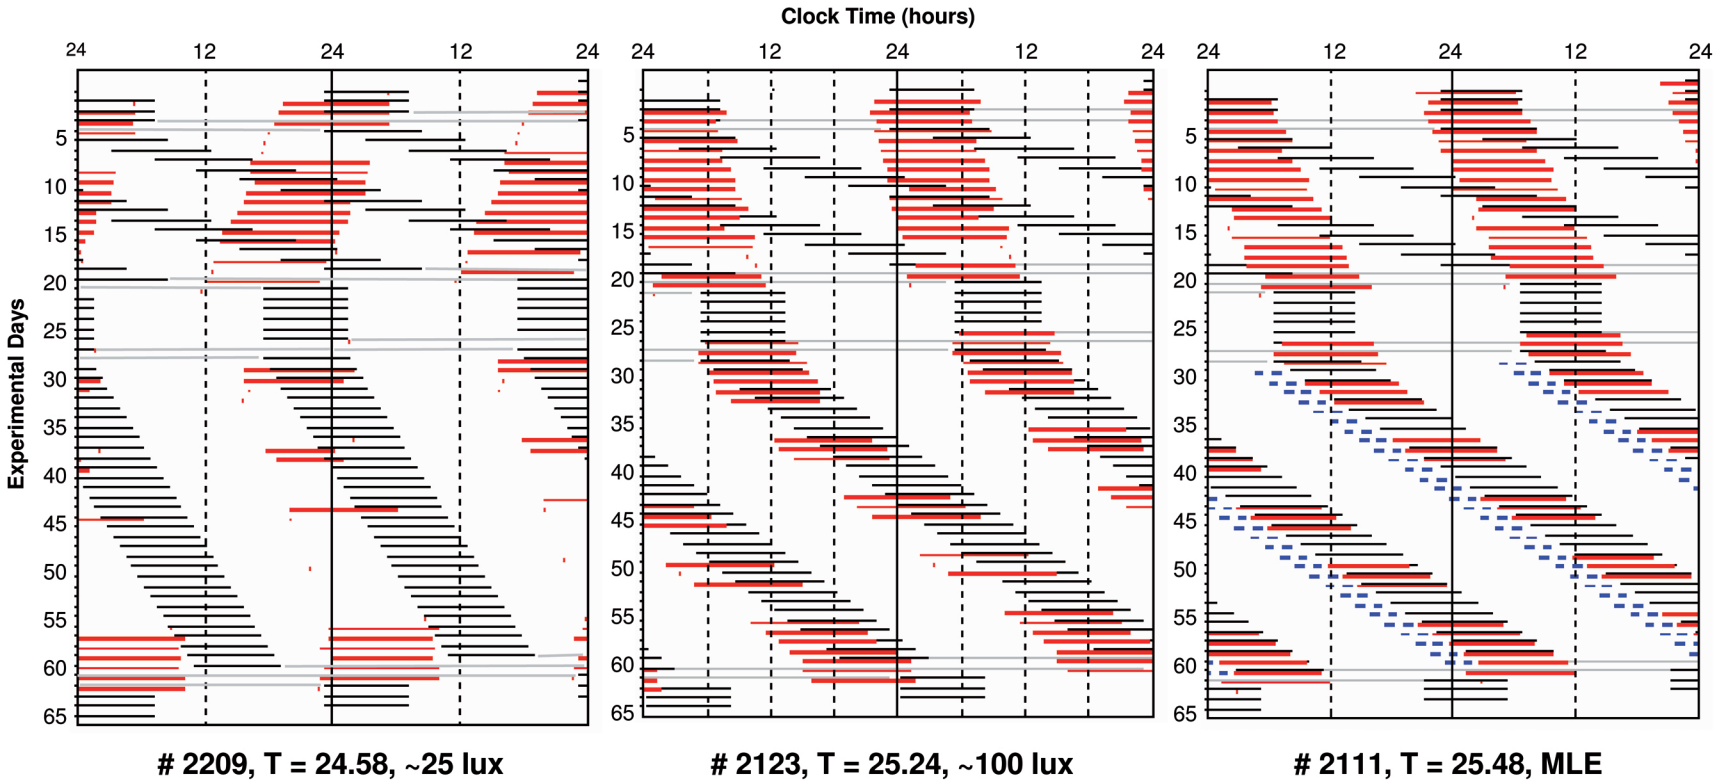

Supplement: pnas_0702835104_2.pdf [file pnas_0702835104_2.pdf]

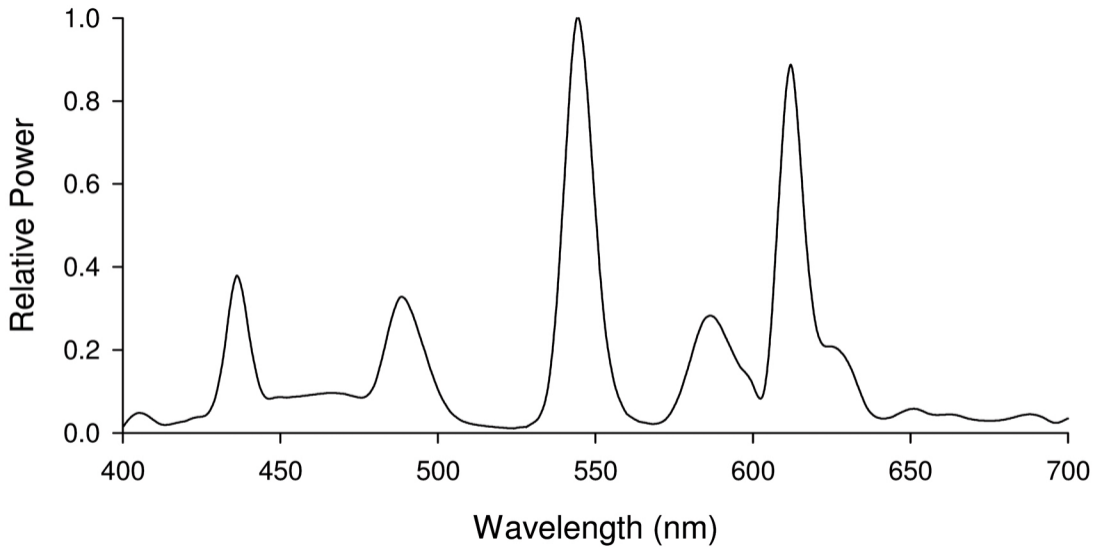

Supplement: pnas_0702835104_3.pdf [file pnas_0702835104_3.pdf]
